# Supplementary material for: Removal of Paracetamol from Aqueous Solutions by Photocatalytic Ozonation over TiO2-MexOy Thin Films
Source: MDPI journal article supplement (doi:10.3390/nano12040613), 2022-02-11
Supplement: s1 [file s1]

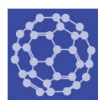

## Article

# Removal of Paracetamol from Aqueous Solutions by Photocatalytic Ozonation over $\text{TiO}_2\text{-Me}_x\text{O}_y$ Thin Films

Sorin Marius Avramescu <sup>1,2</sup>, Irina Fierascu <sup>3,4,\*</sup>, Radu Claudiu Fierascu <sup>3,5,\*</sup>, Roxana Ioana Brazdis <sup>3,5</sup>, Angel Vasile Nica <sup>2</sup>, Claudia Butean <sup>6</sup>, Elena Alina Olaru <sup>2</sup>, Sorin Ulinici <sup>7</sup>, Marian Nicolae Verziu <sup>8</sup> and Anca Dumitru <sup>9,\*</sup>

- <sup>1</sup> Department of Organic Chemistry, Biochemistry and Catalysis, Faculty of Chemistry, University of Bucharest, 050663; Bucharest, Romania; sorin.avramescu@g.unibuc.ro
- <sup>2</sup> PROTMed Research Centre, University of Bucharest, 050107 Bucharest, Romania; nica.angelvasile@yahoo.ro (A.V.N.); alina.olaru@g.unibuc.ro (E.A.O.)
- <sup>3</sup> Emerging Nanotechnologies Group, National Institute for Research & Development in Chemistry and Petrochemistry—ICECHIM, 060021 Bucharest, Romania; roxana.brazdis@icechim.ro
- <sup>4</sup> Faculty of Horticulture, University of Agronomic Sciences and Veterinary Medicine of Bucharest, 011464 Bucharest, Romania
- <sup>5</sup> Department of Science and Engineering of Oxide Materials and Nanomaterials, Faculty of Chemical Engineering and Biotechnologies, University Politehnica of Bucharest, 011061 Bucharest, Romania
- <sup>6</sup> Department of Chemistry and Biology, North University Centre of Baia Mare, Technical University of Cluj-Napoca, 430122, Baia Mare, Romania; dee1168@yahoo.com
- <sup>7</sup> S.C. ICPE Bistrita S.A., 420035 Bistrita, Romania; sorin\_ulinici@icpebn.ro
- <sup>8</sup> Department of Bioresources and Polymer Science, Faculty of Applied Chemistry and Materials Science, University Politehnica of Bucharest, 011061 Bucharest, Romania; marian.verziu@upb.ro
- <sup>9</sup> Faculty of Physics, University of Bucharest, 077125, Măgurele Romania
- \* Correspondence: irina.fierascu@icechim.ro (I.F.); fierascu.radu@icechim.ro (R.C.F.); anca.dumitru@gmail.com (A.D.)

**Citation:** Avramescu, S.M.; Fierascu, I.; Fierascu, R.C.; Brazdis, R.I.; Nica, A.V.; Butean, C.; Olaru, E.A.; Ulinici, S.; Verziu, M.N.; Dumitru, A. Removal of Paracetamol from Aqueous Solutions by Photocatalytic Ozonation over  $\text{TiO}_2\text{-Me}_x\text{O}_y$  Thin Films. *Nanomaterials* **2022**, *12*, 613. <https://doi.org/10.3390/nano12040613>

Academic Editor: Baizeng Fang

Received: 31 December 2021

Accepted: 6 February 2022

Published: 11 February 2022

**Publisher's Note:** MDPI stays neutral with regard to jurisdictional claims in published maps and institutional affiliations.

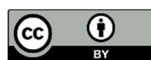

**Copyright:** © 2022 by the authors. Licensee MDPI, Basel, Switzerland. This article is an open access article distributed under the terms and conditions of the Creative Commons Attribution (CC BY) license (<https://creativecommons.org/licenses/by/4.0/>).

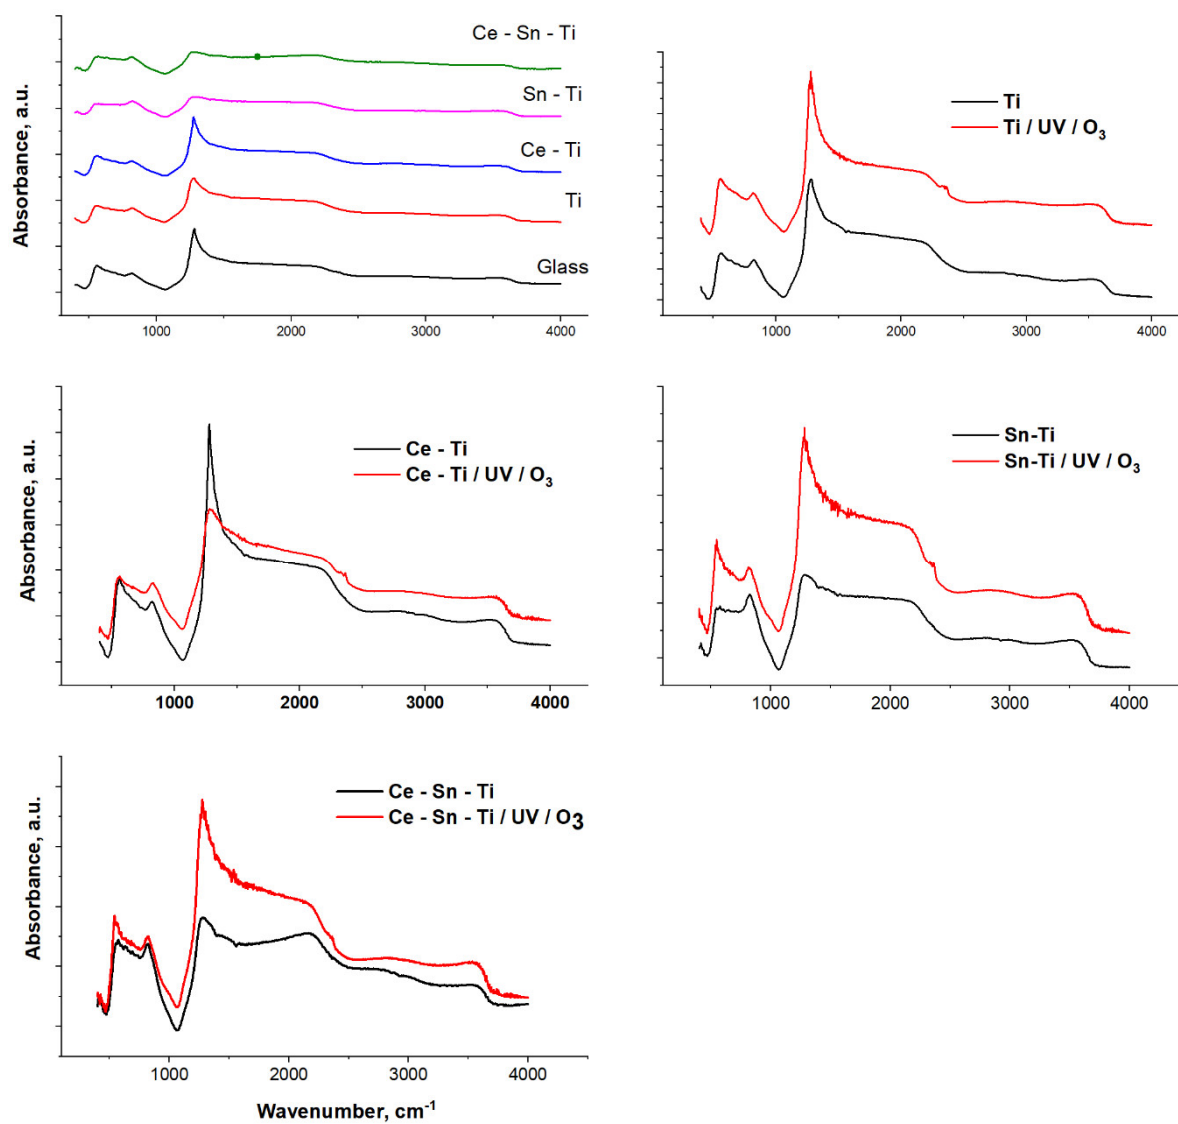

Figure S1. FTIR spectra of prepared film before and after use in oxidation reaction.

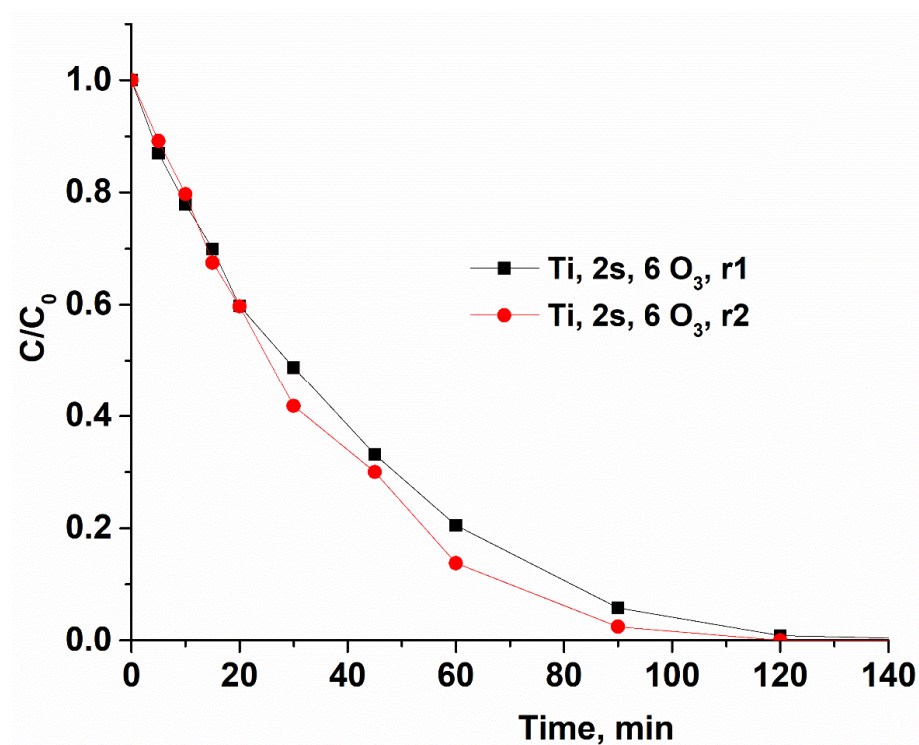

**Figure S2.** Evolution of paracetamol normalized concentration during the oxidation process for (Ti) system for two successive cycles at lower ozone concentrations and 2 number of slides.

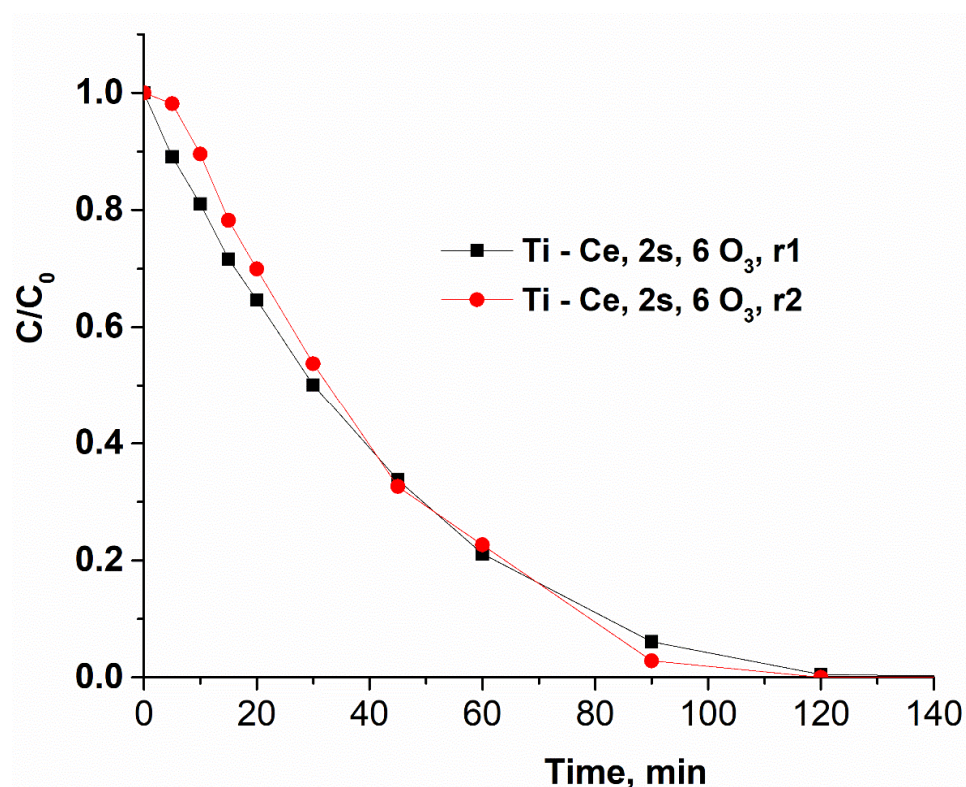

**Figure S3.** Evolution of paracetamol normalized concentration during the oxidation process for (Ti-Ce) system for two successive cycles at lower ozone concentrations and 2 number of slides.



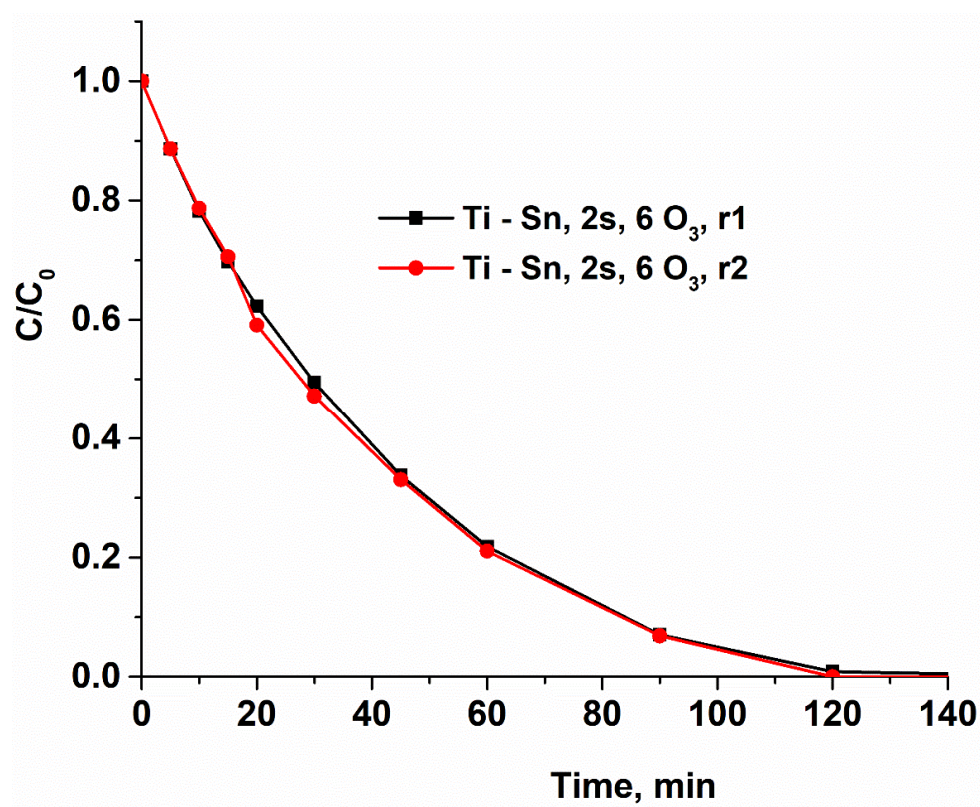

**Figure S4.** Evolution of paracetamol normalized concentration during the oxidation process for (Ti-Sn) system for two successive cycles at lower ozone concentrations and 2 number of slides.

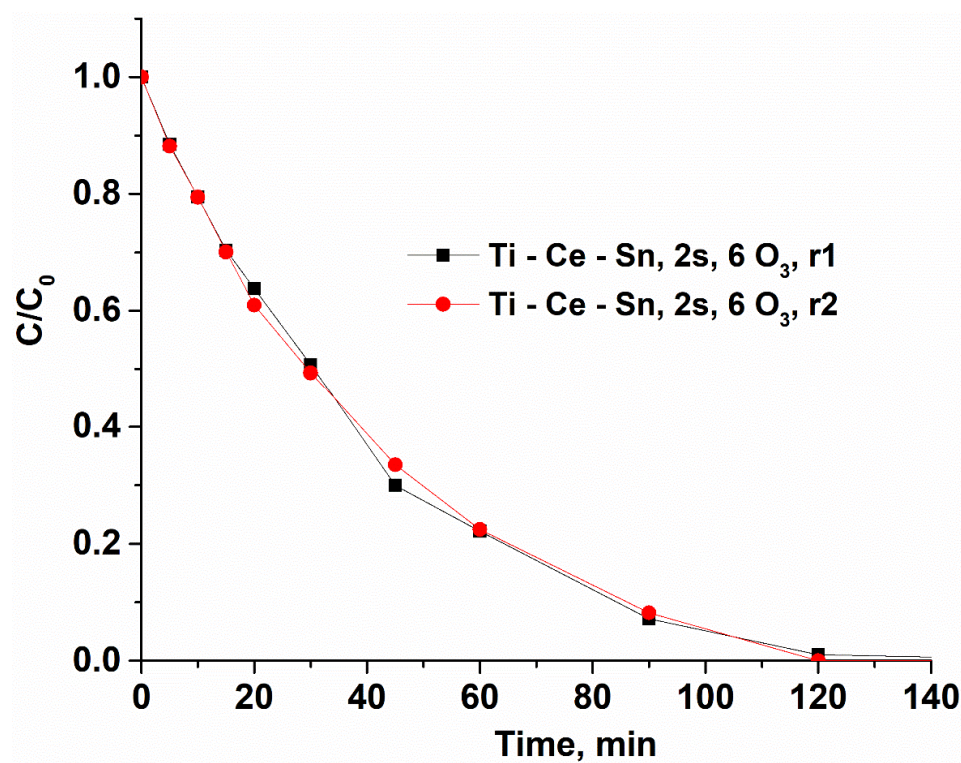

**Figure S5.** Evolution of paracetamol normalized concentration during the oxidation process for (Ti-Ce-Sn) system for two successive cycles at lower ozone concentrations and 2 number of slides.

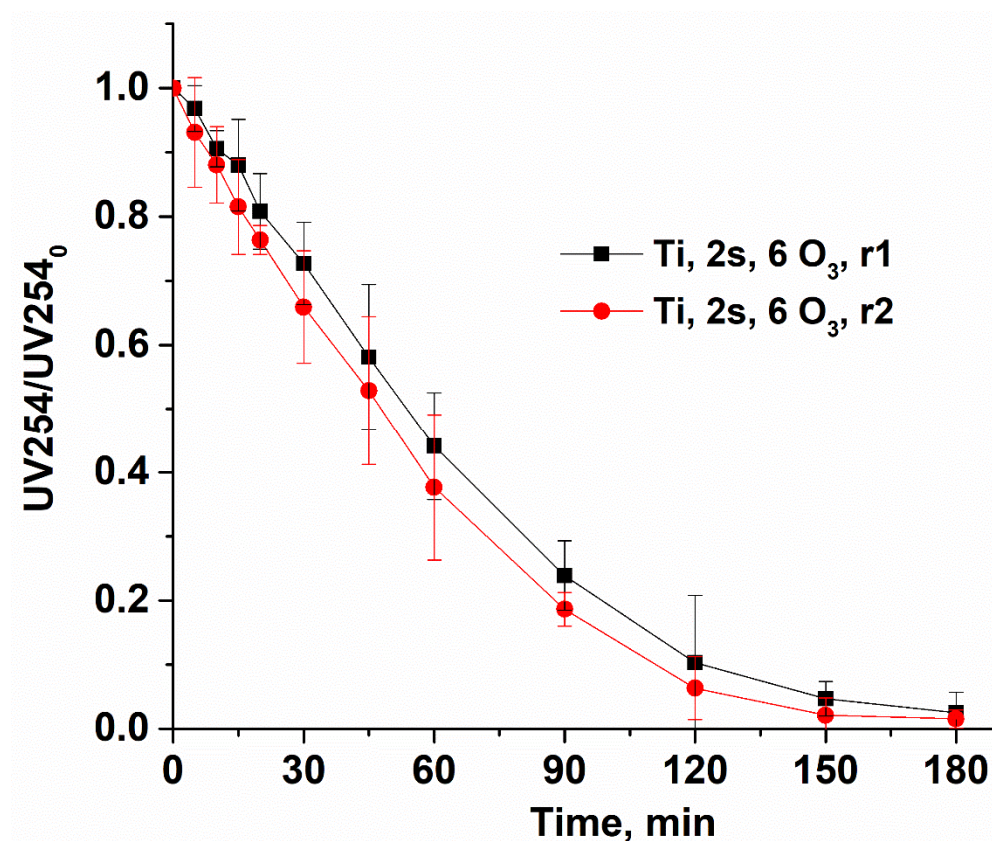

**Figure S6.** Evolution of normalized UV254 parameter during the oxidation process for (Ti) system for two successive cycles at lower ozone concentrations and 2 number of

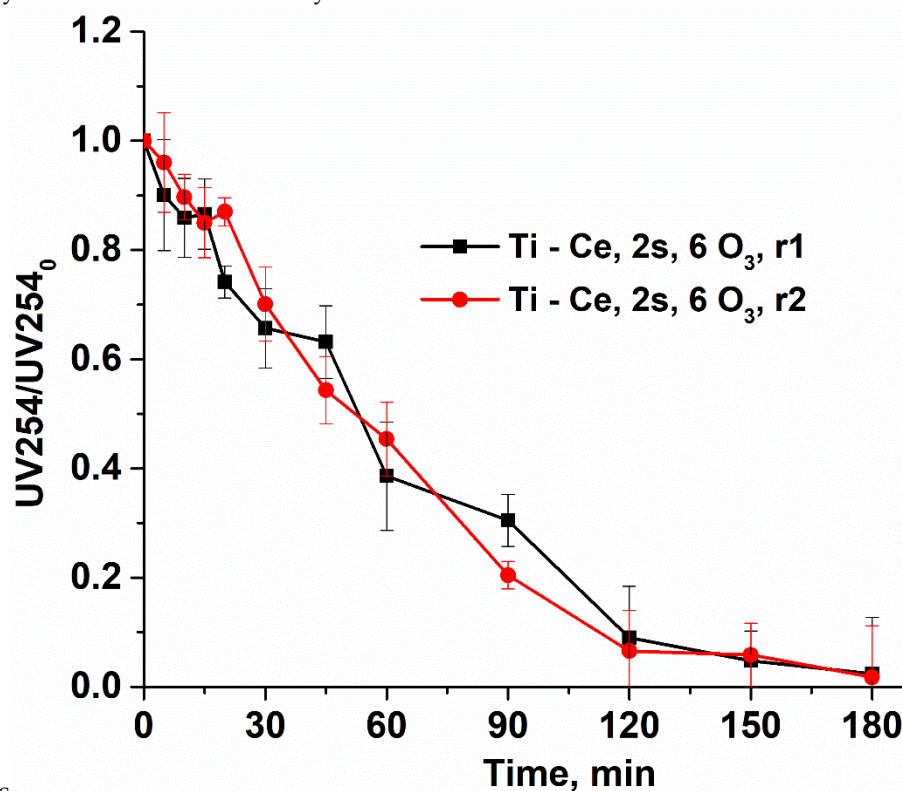

slides

**Figure S7.** Evolution of normalized UV254 parameter during the oxidation process for (Ti-Ce) system for two successive cycles at lower ozone concentrations and 2 number of slides.



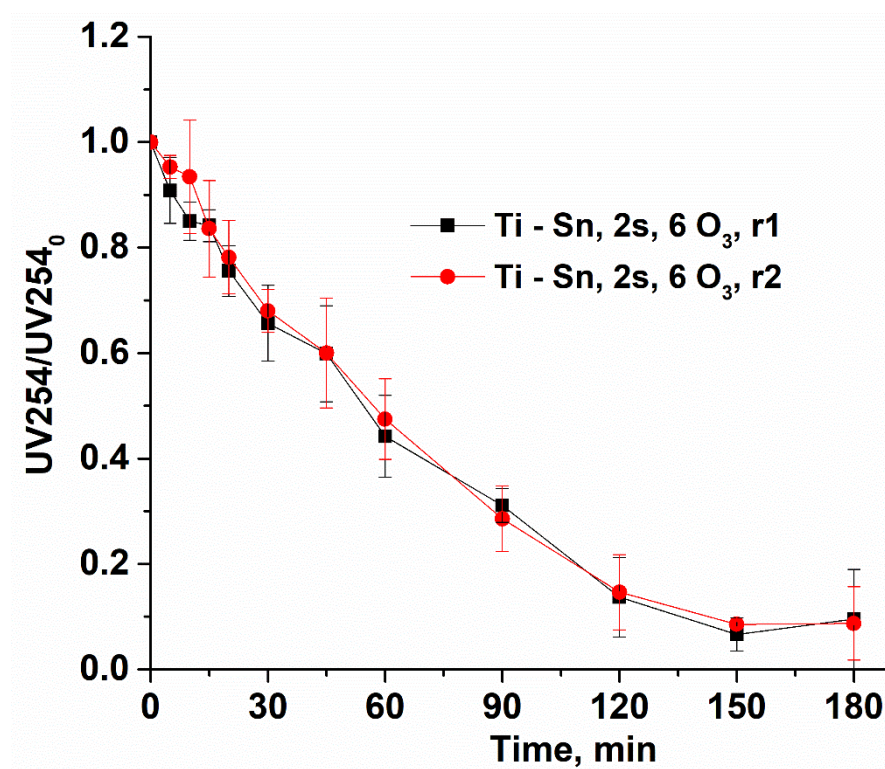

**Figure S8.** Evolution of normalized UV254 parameter during the oxidation process for (Ti-Sn) system for two successive cycles at lower ozone concentrations and 2 number of slides.

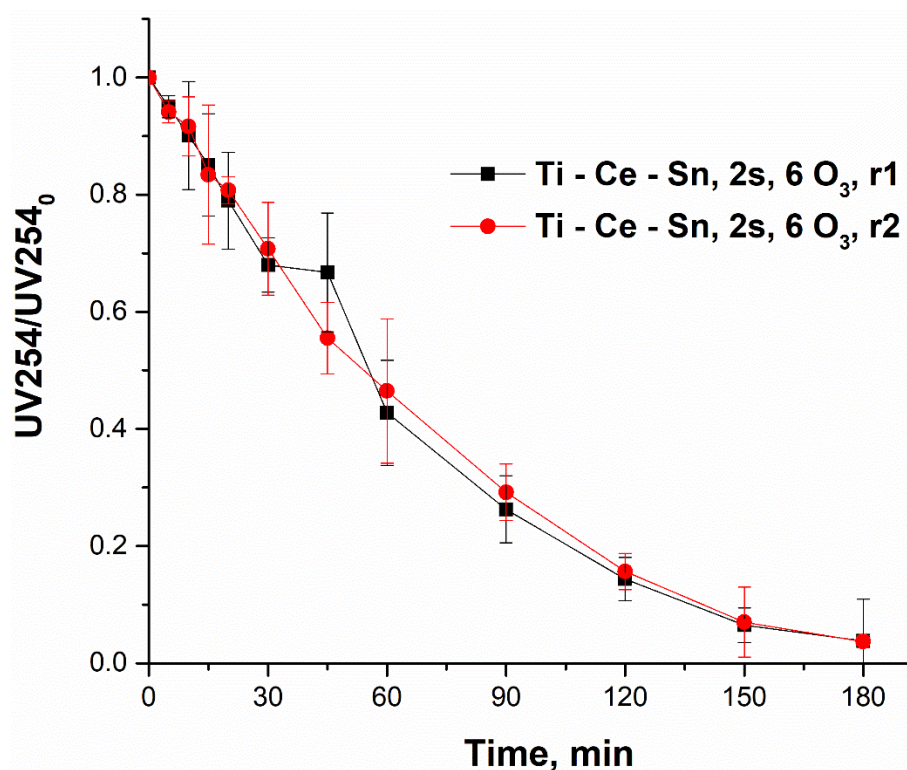

**Figure S9** Evolution of normalized UV254 parameter during the oxidation process for (Ti-Ce) system for two successive cycles at lower ozone concentrations and 2 number of slides.
